# Supplementary material for: Reconstructing climate trends adds skills to seasonal reference crop evapotranspiration forecasting
Source: Copernicus journal article supplement (doi:10.5194/hess-26-941-2022), 2022-02-18
Supplement: Supplementary file 1 [file hess-26-941-2022-supplement.pdf]

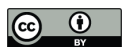

*Supplement of*

## **Reconstructing climate trends adds skills to seasonal reference crop evapotranspiration forecasting**

**Qichun Yang et al.**

*Correspondence to:* Qichun Yang (qichun.yang@unimelb.edu.au)

The copyright of individual parts of the supplement might differ from the article licence.

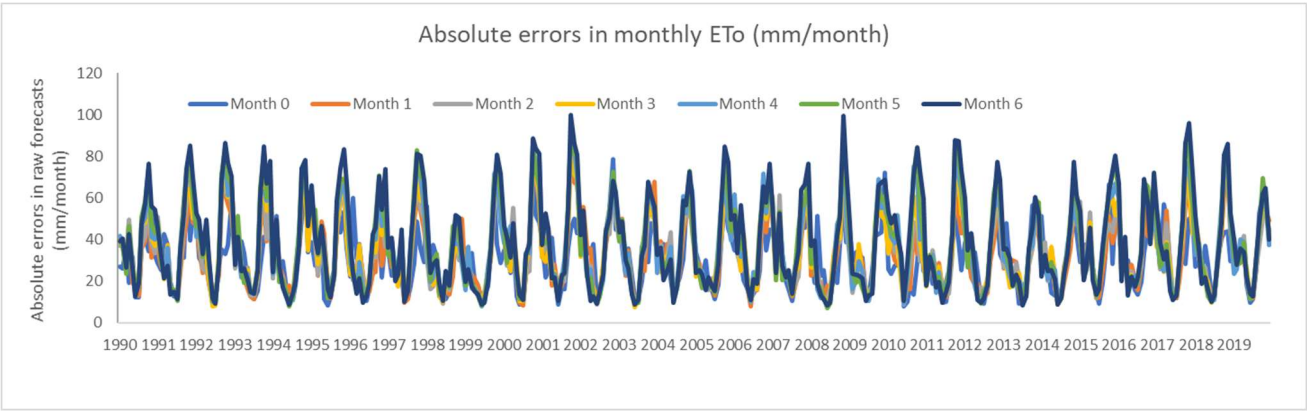

Figure S1. Absolute errors in raw ECMWF ETo forecasts.

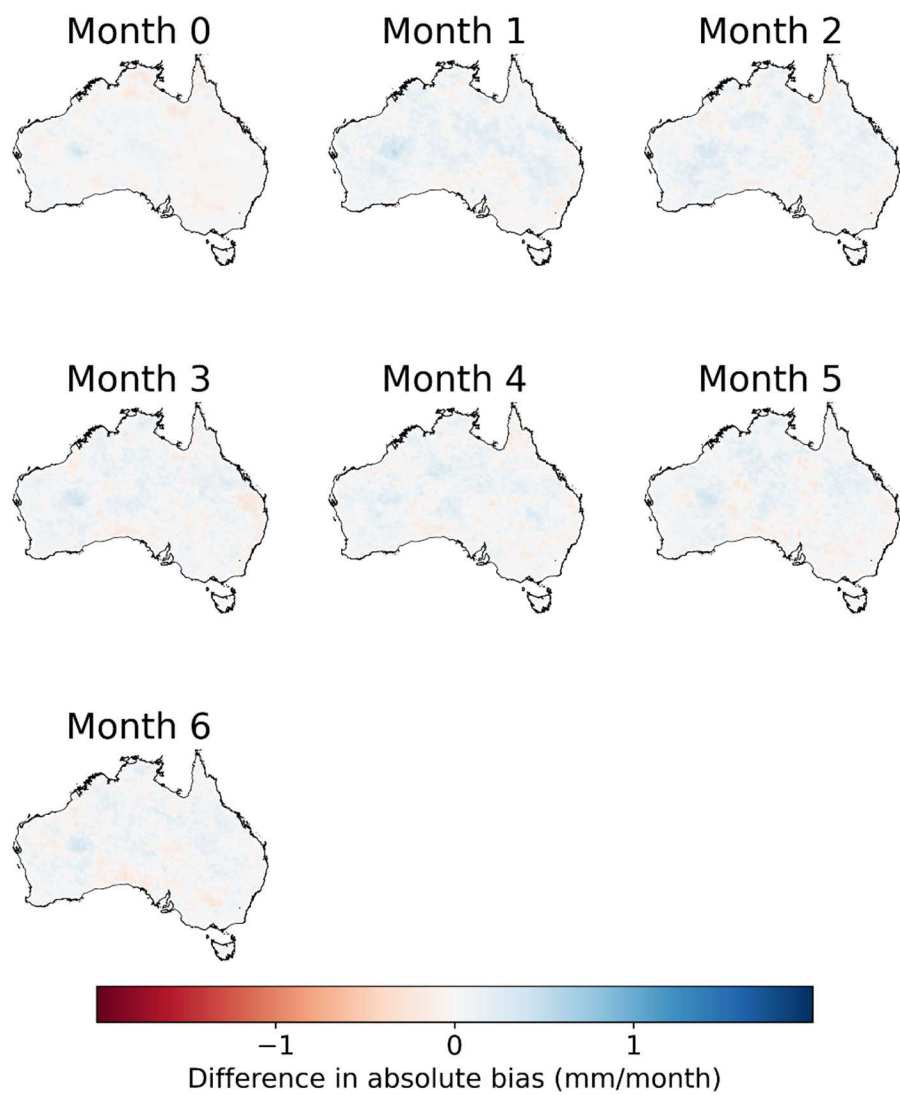

Figure S2. Differences in absolute bias between BJP-ti and BJP calibrated forecasts.

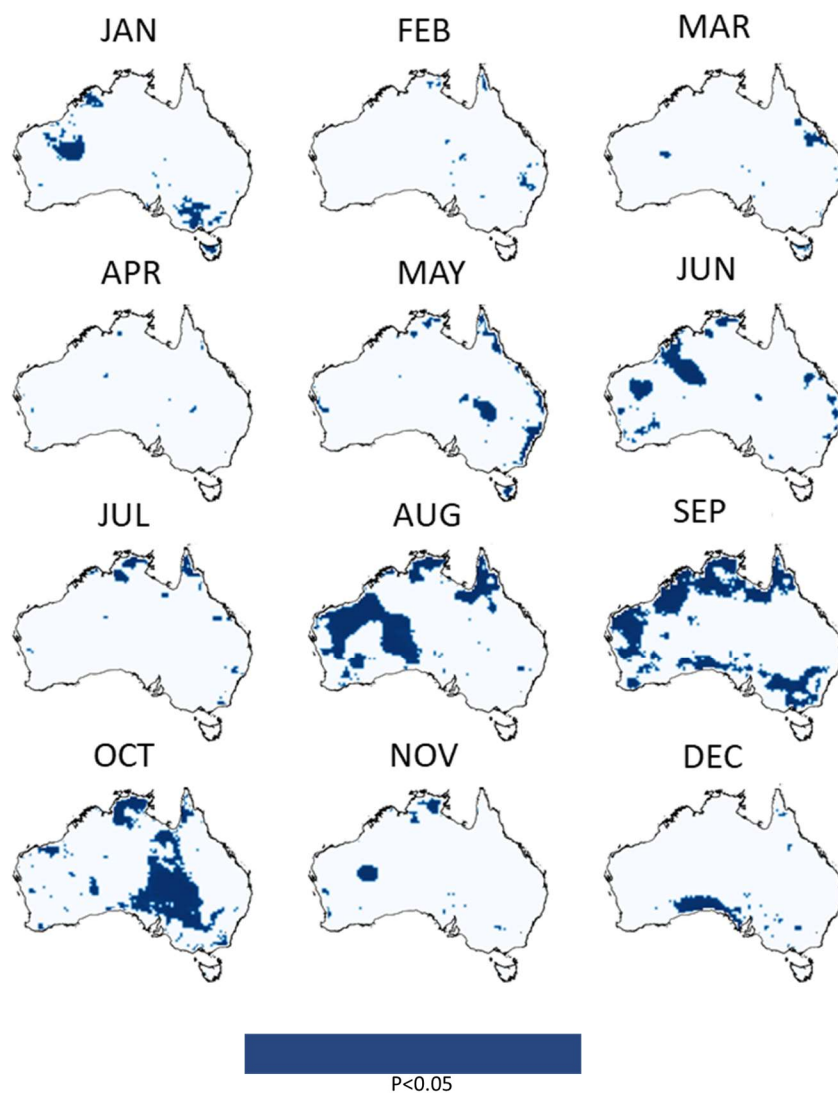

Figure S3. Significance of trends in transformed  $ET_0$  observations by month. Dark blue shows regions with statistically significant trends (at the 95% confidence interval).

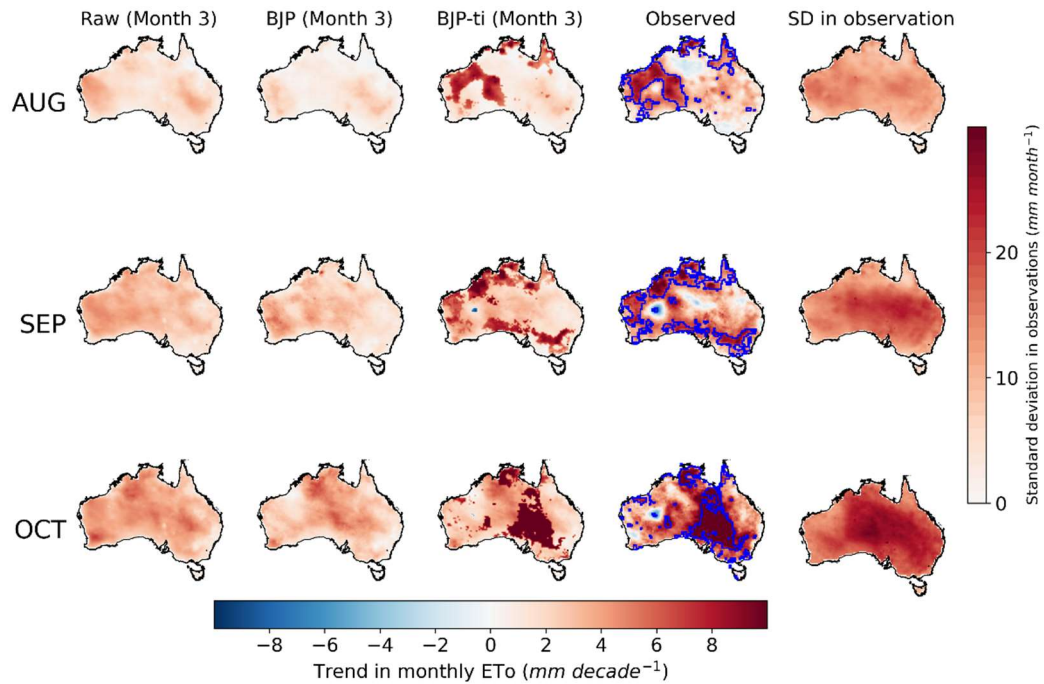

Figure S4. Trends in raw forecasts, BJP calibrated forecasts, BJP-ti calibrated forecasts for Month 3, and observed ETo for three selected months. Blue polygons show regions where observed trends are statistically significant. SD refers to standard deviation.

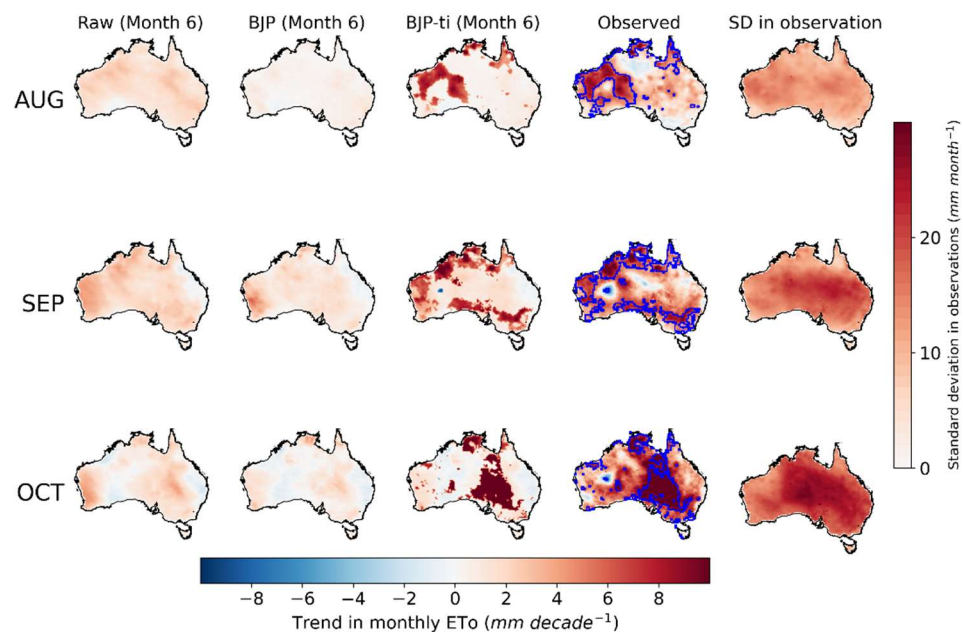

Figure S5. Trends in raw forecasts, BJP calibrated forecasts, BJP-ti calibrated forecasts for Month 6, and observed  $ET_0$  for three selected months. Blue polygons show regions where observed trends are statistically significant. SD refers to standard deviation.

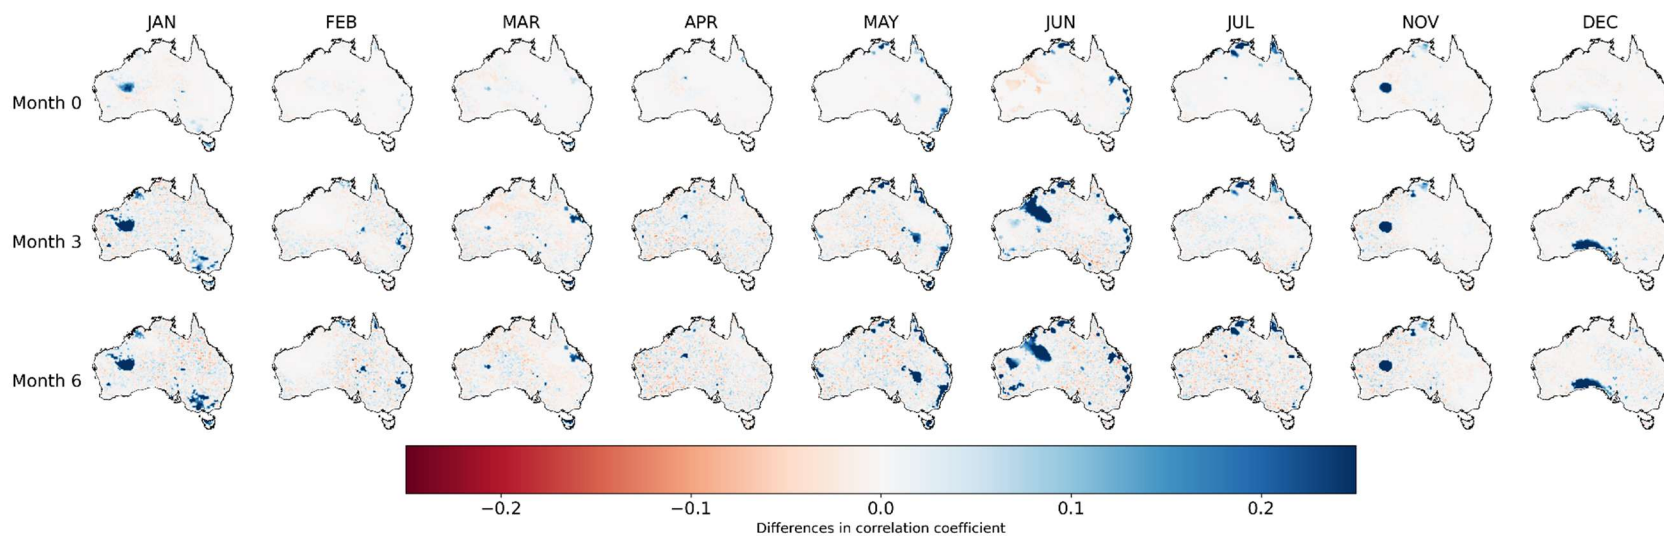

Figure S6. Differences in correlation coefficient between BJP-ti calibrated forecasts and observations with that between BJP calibrated forecasts and observations for nine selected months and three lead times (Months 0, 3, and 6).

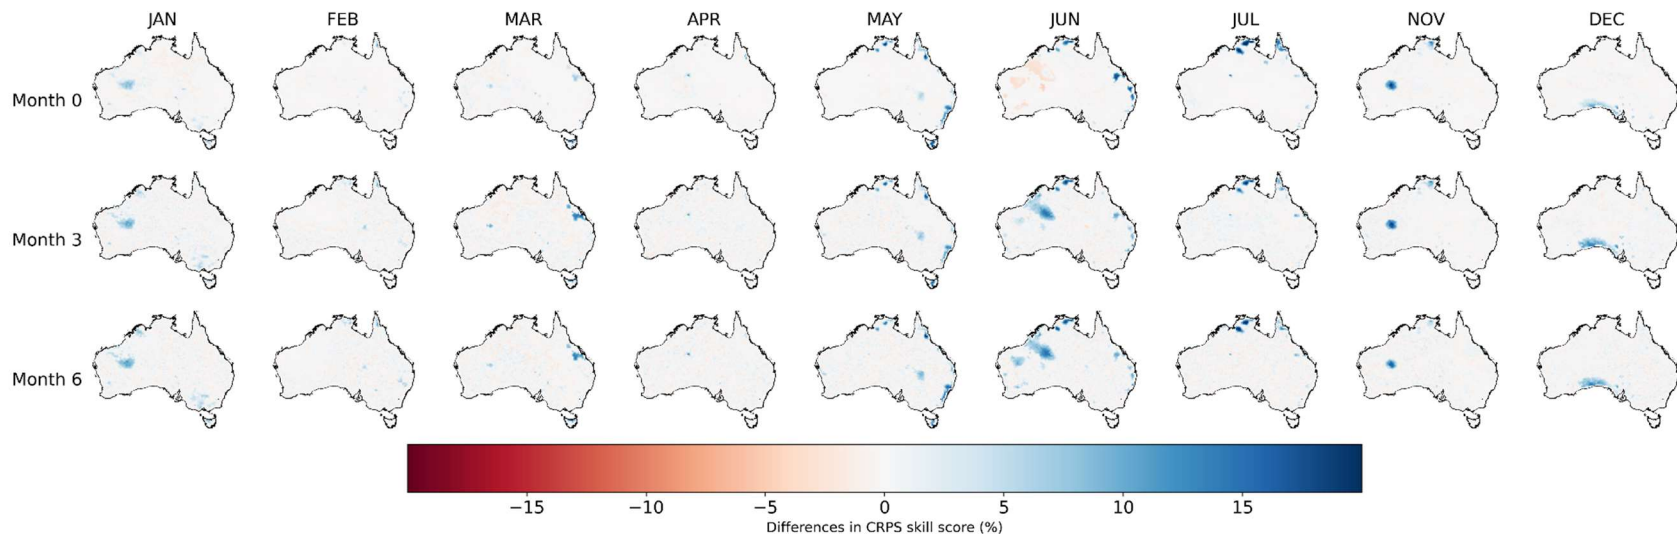

Figure S7. Differences in CRPS skill score between BJP-ti calibrated forecasts and observations with that between BJP calibrated forecasts and observations for nine selected months and three lead times (Months 0, 3, and 6).

40  
41  
42  
43

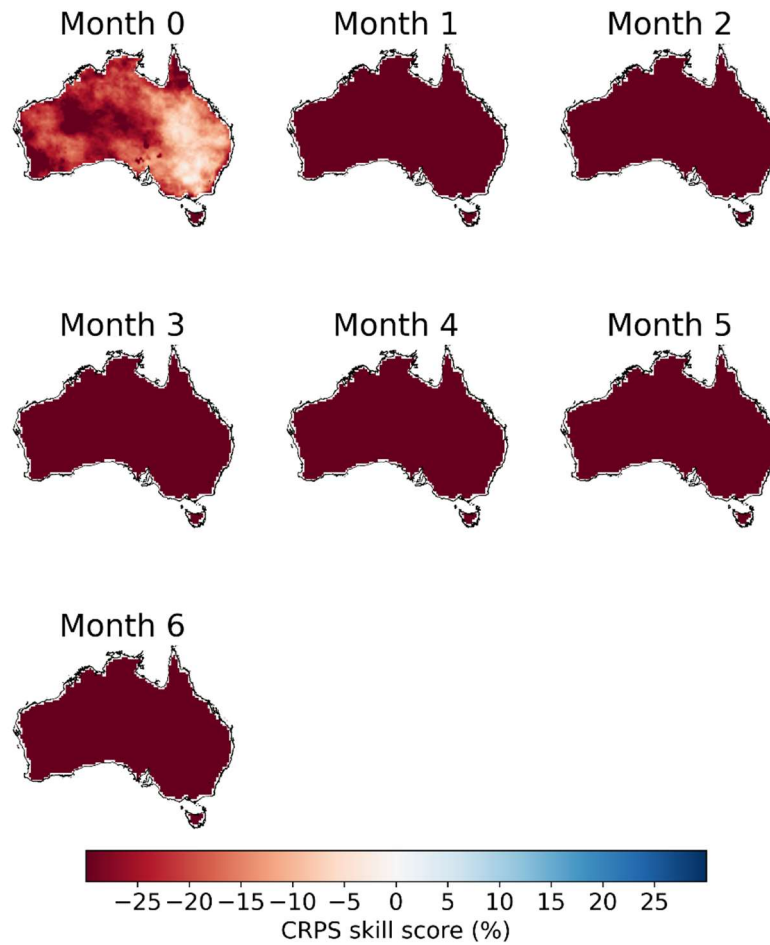

44  
45  
46  
47  
48  
49  
50  
51  
52  
53

Figure S8. CRPS skill score of bias-corrected ETo forecasts.

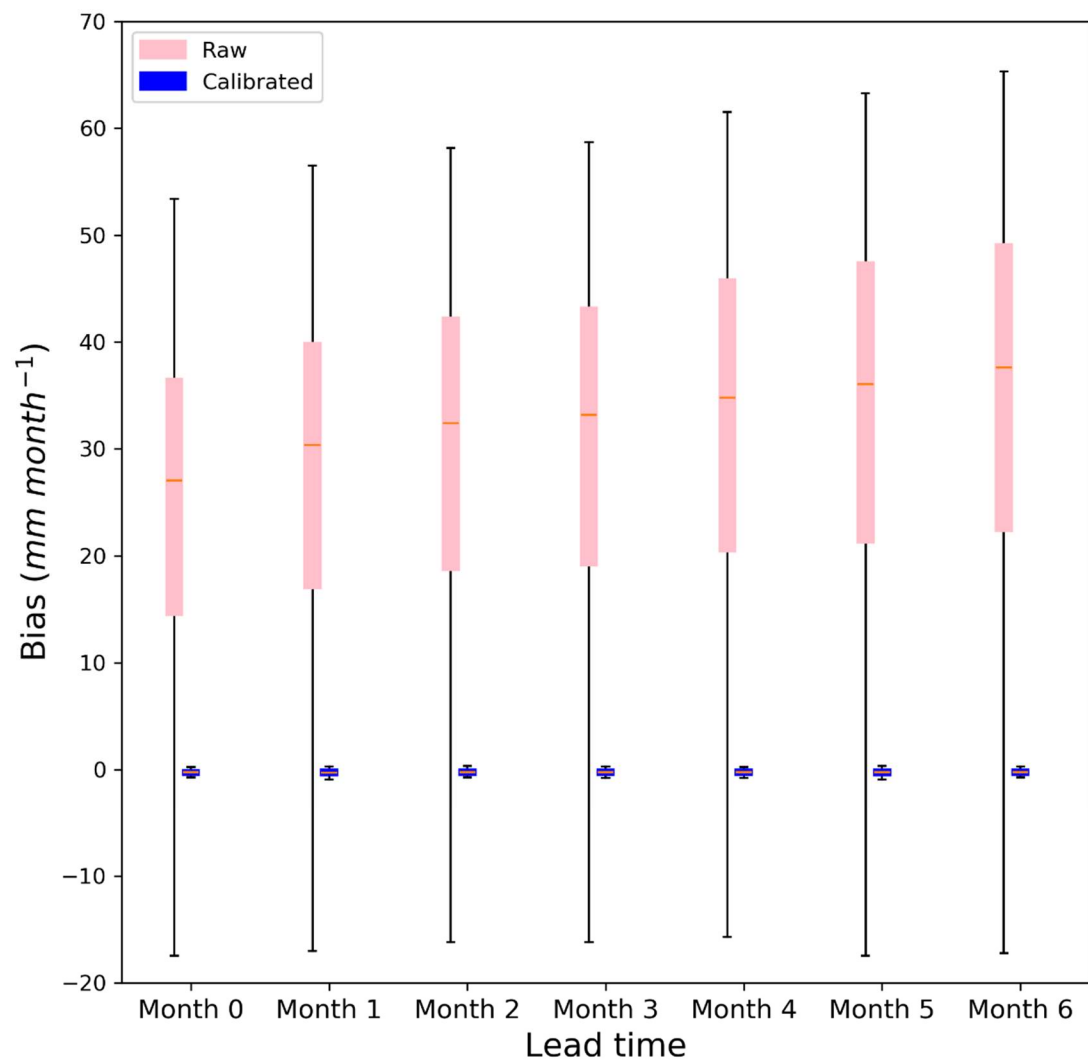

Figure S9. Boxplot of bias in raw and BJP-ti calibrated forecasts.

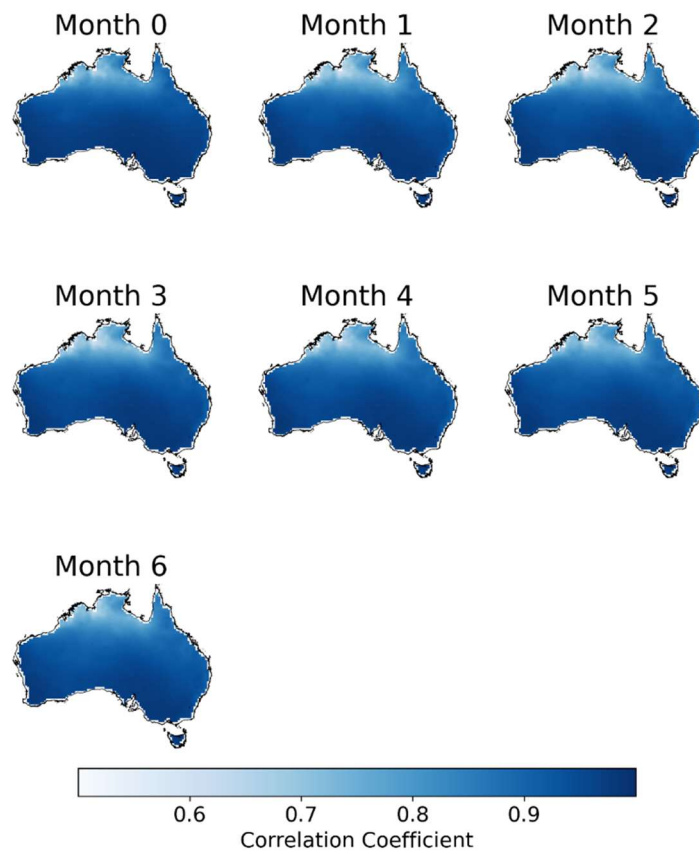

Figure S10. Correlation coefficients between raw ET<sub>0</sub> forecasts and observations.

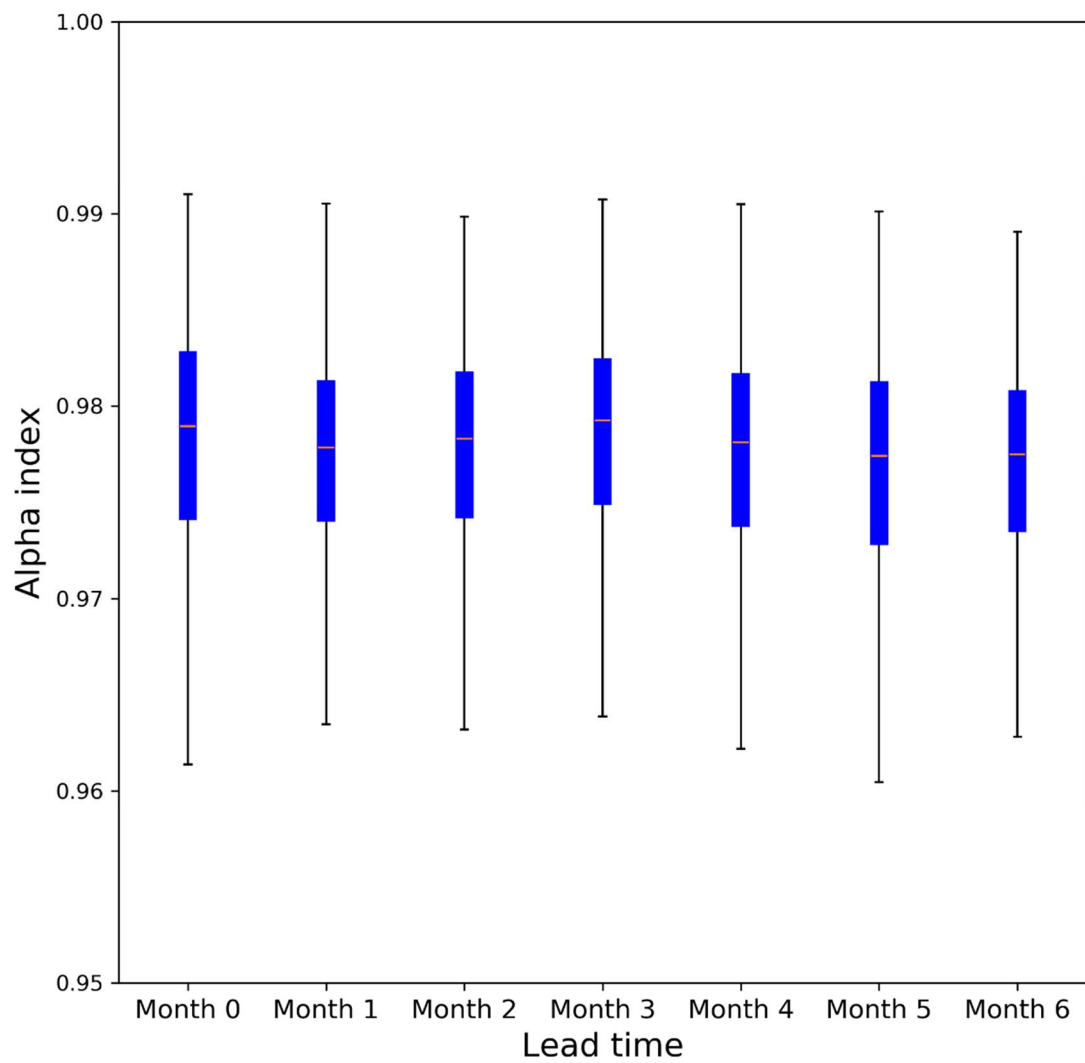

Figure S11. Boxplot of  $\alpha$ -index of BJP-ti calibrated forecasts.

79  
80  
81  
82

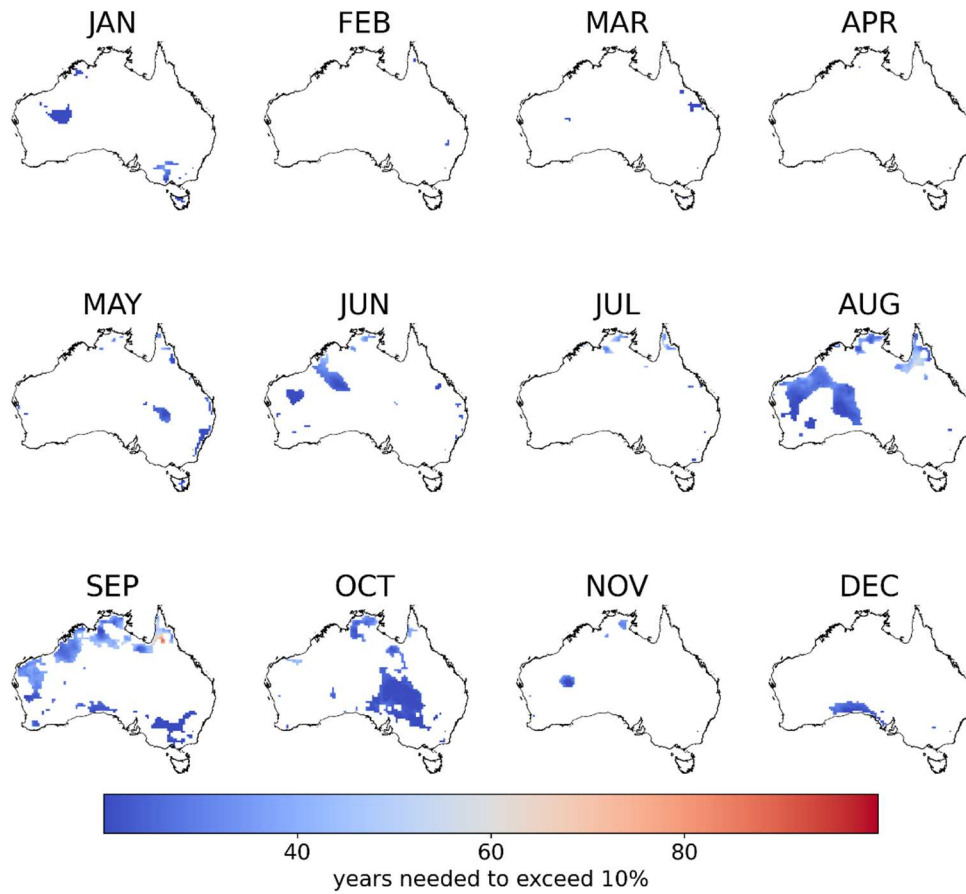

83  
84  
85

Figure S12. Years needed for the departures of climatology forecasts from the BJP-ti calibrated forecasts to exceed 10%.

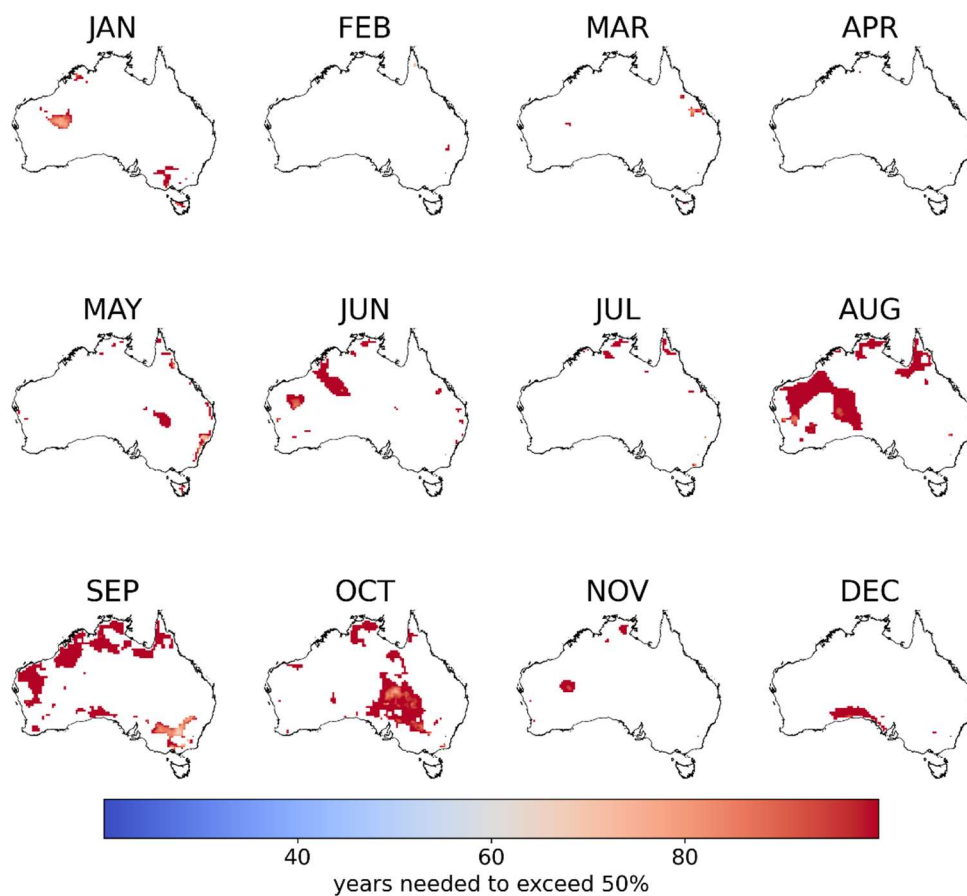

Figure S13. Years needed for the departures of climatology forecasts from the BJP-ti calibrated forecasts to exceed 50%.
